1 The Oscillatory ReConstruction Algorithm (ORCA) adaptively identifies frequency  
2 bands to improve spectral decomposition in human and rodent neural recordings

3  
4 Andrew J Watrous<sup>1,2,3,4,5</sup>, Robert Buchanan<sup>2,4,5,6,7</sup>

- 5  
6 1. Department of Neurology, Dell Medical School, The University of Texas at  
7 Austin, Austin, TX 78712  
8 2. Institute for Neuroscience, The University of Texas at Austin, Austin, TX  
9 78712  
10 3. Center for Learning and Memory, The University of Texas at Austin,  
11 Austin, TX 78712  
12 4. Department of Psychology, The University of Texas at Austin, Austin, TX  
13 78712  
14 5. Seton Brain and Spine Institute, Division of Neurosurgery, Austin, TX  
15 78701  
16 6. Department of Neurosurgery, Dell Medical School, The University of  
17 Texas at Austin, 78712  
18 7. Department of Psychiatry, Dell Medical School, The University of Texas at  
19 Austin, 78712  
20

21 **Abstract:**

22 Neural oscillations are routinely analyzed using methods that measure activity in  
23 canonical frequency bands (e.g. alpha, 8-12 Hz), though the frequency of neural  
24 signals is not fixed and varies within and across individuals based on numerous  
25 factors including neuroanatomy, behavioral demands, and species. Further,  
26 band-limited activity is an often assumed, typically unmeasured model of neural  
27 activity and band definitions vary considerably across studies. These factors  
28 together mask individual differences and can lead to noisy spectral estimates and  
29 interpretational problems when linking electrophysiology to behavior. We  
30 developed the Oscillatory ReConstruction Algorithm (“ORCA”), an unsupervised  
31 method to measure the spectral characteristics of neural signals in adaptively  
32 identified bands which incorporates two new methods for frequency band  
33 identification. ORCA uses the instantaneous power, phase, and frequency of  
34 activity in each band to reconstruct the signal and directly quantify spectral  
35 decomposition performance using each of four different models. To reduce  
36 researcher bias, ORCA provides spectral estimates derived from the best model  
37 and requires minimal hyperparameterization. Analyzing human scalp EEG data  
38 during eyes open and eyes-closed “resting” conditions, we first identify variability  
39 in the frequency content of neural signals across subjects and electrodes. We  
40 demonstrate that ORCA significantly improves spectral decomposition compared  
41 to conventional methods and captures the well-known increase in low-frequency  
42 activity during eyes closure in electrode- and subject-specific frequency bands.  
43 We further illustrate the utility of our method in rodent CA1 recordings. ORCA is a  
44 novel analytic tool that will allow researchers to investigate how non-stationary  
45 neural oscillations vary across behaviors, brain regions, individuals, and species.  
46

## 47 **Introduction**

48 Neural oscillations are increasingly recognized as important mesoscopic  
49 components of the neural code (Buzsaki 2012; Hanslmayr et al., 2012; Watrous et  
50 al., 2015a). Several lines of evidence across species and behaviors demonstrate that  
51 the frequency of neural oscillations varies across individuals and shifts to support  
52 neural communication and influence behavior (Klimesch 1999; Rudrauf et al., 2006;  
53 Cohen 2014; Wutz et al., 2018; Watrous et al., 2013; Furman et al., 2018; Mireau et  
54 al., 2017). Across-study differences in both the recording equipment and electrode  
55 positioning relative to dipoles may further contribute to frequency variability.  
56 Finally, inter- and intra-subject frequency variability has been observed even when  
57 using the same equipment and sampling the same cortical areas (Haegens et al.,  
58 2014; Zhang et al., 2018). These factors limit researcher’s ability to link oscillations  
59 to neuronal spiking and behavior in individual subjects, particularly under  
60 circumstances in which frequency variability may obscure spectral decomposition  
61 from filtering artifacts (de Cheveigne’ and Nelken, 2019).

62  
63 To overcome such frequency variability and gain statistical insights by reducing the  
64 number of comparisons (i.e. frequencies), many existing approaches perform  
65 spectral decomposition in canonical, *a priori* frequency bands (e.g. “alpha”, ~8-12  
66 Hz) and average results over subjects (e.g. Addante, Watrous et al., 2011), although  
67 there are several limitations with this approach. First, defining frequency bands can  
68 be subject to researcher bias and band definitions are inconsistent across studies,  
69 leading to confusion amongst researchers (Newsom and Thiagarajan, 2019). Second,  
70 this approach conflates periodic and aperiodic components of the signal and makes  
71 assumptions about waveform shape (Haller, Donoghue, Peterson et al., 2018; Cole &  
72 Voytek, 2017), and is rarely quantified or compared against alternatives. Finally, the  
73 usage of canonical frequency bands obscures subject-level variability.

74  
75 It thus remains unclear which frequency bands, which we consider as implicit  
76 models of oscillatory activity, produce the best spectral decomposition for  
77 individual subjects. We posit that the usage of canonical frequency bands has been  
78 historically necessary (Brazier et al., 1961) but constitutes an untested model of  
79 oscillatory activity that warrants quantification. Building upon prior methods that  
80 aim to identify bands based on time-averaged power spectra (Haller, Donoghue,  
81 Peterson, et al, Watrous et al., 2018) and quantify oscillatory components of neural  
82 signals (Hughes et al., 2012), we sought to derive temporally-resolved and  
83 electrode-specific spectral estimates by directly quantifying spectral decomposition  
84 performance using different frequency bands.

85  
86 Here, we present the Oscillatory ReConstruction Algorithm (“ORCA”) that is  
87 designed to capture spectral variability and improve spectral decomposition. We  
88 introduce new methods for identifying frequency bands based on either spectral  
89 peaks relative to the signal background, spectral variability, or explained variance,  
90 and compare these methods to canonical frequency bands. ORCA quantifies spectral  
91 decomposition performance using each method through signal reconstruction and  
92 comparison to the input signal and provides as output the instantaneous amplitude,

93 phase, & frequency of activity in optimized bands. ORCA is thus a novel spectral  
94 decomposition and recombination algorithm that blindly improves spectral  
95 estimates using a data-driven approach to minimize experimenter bias. Our results  
96 demonstrate that ORCA captures subject- and electrode-specific oscillatory signals  
97 in human and rodent data, improves spectral decomposition compared to existing  
98 methods, and captures classical low-frequency modulations associated with eye  
99 closure in resting scalp EEG. We thus provide a proof of principle for improving the  
100 spectral decomposition of diverse neural recordings.

101

## 102 Results

103 To investigate the issue of frequency variability across subjects, we first analyzed  
104 the frequency content in a scalp EEG dataset recorded from 22 subjects during eyes  
105 open and eyes closed resting conditions. We used a reconstruction-based approach  
106 that quantifies the explained variance each frequency contributes to the neural  
107 signal. Figure 1A shows the  $r^2$  values for the first 3 subjects in the dataset and  
108 reveals considerable diversity in the frequency content of neural signals both across  
109 subjects and electrodes. Focusing on occipital sensors across subjects, we  
110 nonetheless identified a peak in the canonical alpha range in many subjects and  
111 sensors (Figure 1B). Interrogating activity at individual frequencies, we found that  
112 average  $r^2$  values were largest at occipital sites for 10 Hz activity in the canonical  
113 alpha band and were largest at frontal midline sites for activity in the canonical  
114 delta and theta bands (Figure 1C). Given the considerable frequency diversity  
115 across subjects and electrodes (Figure S1), these observations suggest that spectral  
116 decomposition should benefit when the particular spectral characteristics of each  
117 EEG channel are taken into consideration.

118

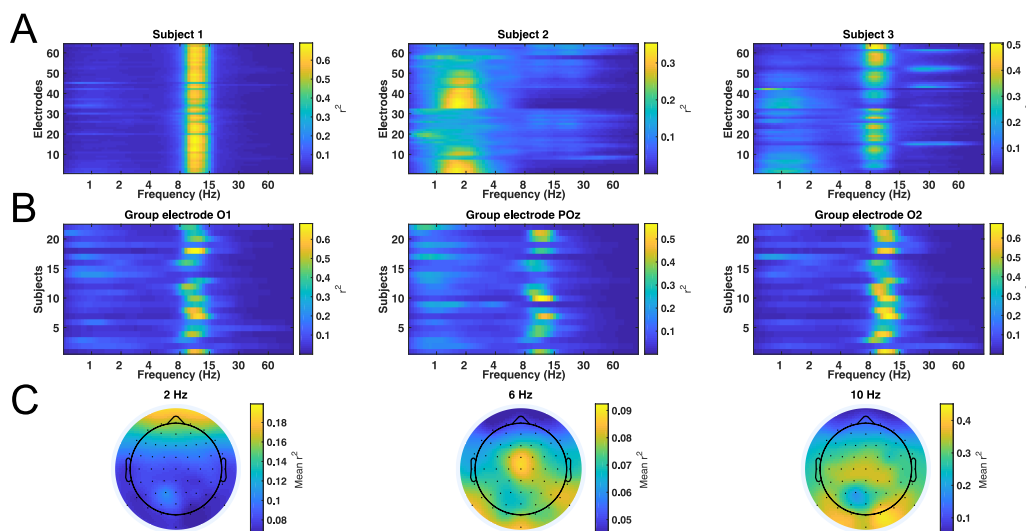

119

120 **Figure 1 Spectral variability across subjects and electrodes.**

121 A) Explained variance ( $r^2$ ) at each electrode and frequency in the first 3 subjects. B)  
122 Explained variance for all subjects at 3 posterior electrodes, O1, POz, and O2. Most  
123 subjects show a peak in explained variance around 10 Hz but with considerable

124 frequency variability across subjects. C) Group-averaged  $r^2$  values at each electrode  
 125 location, plotted separately for activity at 2, 6, and 10 Hz. Average  $r^2$  values are  
 126 largest over frontal sites at 2Hz and over posterior sites at 10 Hz.

127

128 We developed ORCA towards this goal, aiming to improve spectral decomposition  
 129 by using data-driven band identification methods. Figure 2 shows a schematic of the  
 130 keys steps in the ORCA algorithm for electrode O1 from subject 1 (see methods for  
 131 further details). The signal is pre-processed and subject to four different methods  
 132 for band identification (Figure 2A-B). ORCA uses a subset of the recorded signal to  
 133 identify bands and avoid over-fitting. The signal is band-pass filtered in each band  
 134 (Figure 2C) and the amplitude, phase, and frequency of the signal in each band are  
 135 extracted following a Hilbert transform. These spectral estimates are then used  
 136 during *spectral recomposition* to reconstruct the input signal (Figure 2D).

137 Reconstruction accuracy is quantified via  $r^2$  fit between the input and reconstructed  
 138 signal (Figure 2E). The bands and spectral estimates that produce the best  
 139 reconstruction are retained and used to calculate a normalized amplitude measure  
 140 in each band (Figure 2F). On this example electrode, bands based on the explained  
 141 variance (i.e. Coefficient of determination method, 'CoD', green) outperformed each  
 142 other method in reconstructing the neural signal (Figure 2E). This example, along  
 143 with another using rodent data (Figure 2, Supplement 1; see further below for  
 144 rodent results), quantitatively demonstrates that spectral decomposition can be  
 145 improved using electrode-specific frequency bands.

146

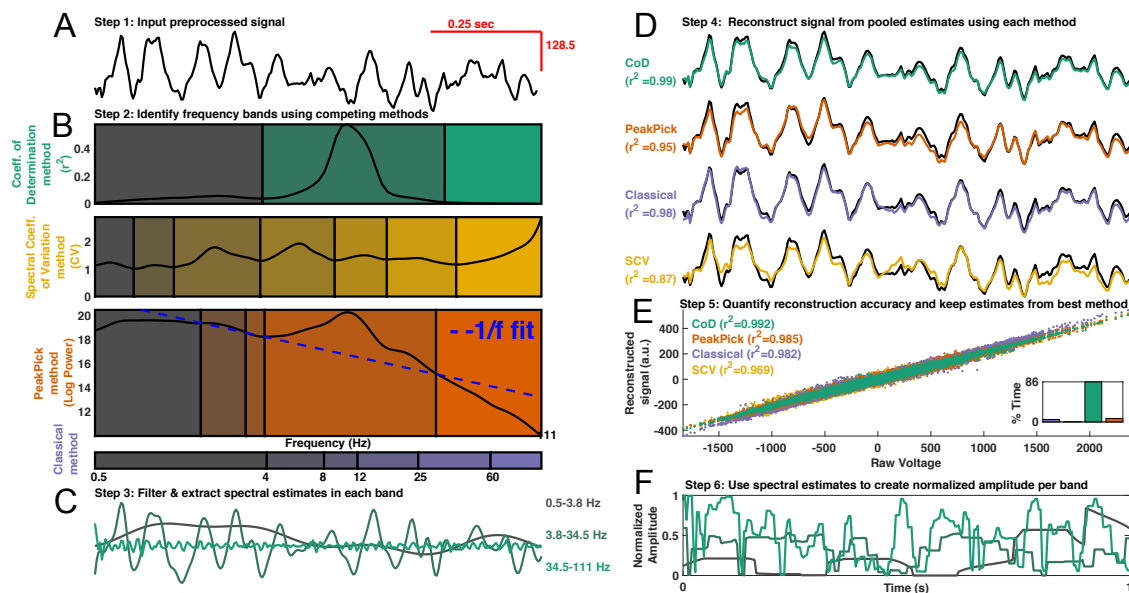

147

## 148 **Figure 2 ORCA Schematic**

149 Schematic of the key steps in the ORCA algorithm, illustrated using example  
 150 electrode O1 from Patient 1. For an example using rodent data, see Figure 2  
 151 Supplement 1. A) Step 1: Preprocess the signal, with optional steps including signal  
 152 rectification, notch filtering to remove line noise, broadband filtering to restrict  
 153 signal activity into a range of interest (e.g. .5-128 Hz), and downsampling. B) Step 2:  
 154 Band Identification. Colored boxes indicate different possible band boundaries

155 identified using each of 4 different methods. The upper green panel shows bands  
156 identified using the Coefficient of determination (“CoD”) method, which proved best  
157 on this electrode. The middle panel in yellow shows band identified using the  
158 spectral coefficient of variation and bands detected using a peak-picking algorithm  
159 are shown in blue. The orange panel shows bands identified using the PeakPick  
160 method (Watrous et al., 2018). The dashed blue line shows the estimated 1/f signal.  
161 The purple lower panel shows the classical bands . C) Step 3: For each method,  
162 spectral estimates are extracted in each band using the filter & Hilbert transform  
163 method. The filtered signal in each CoD identified band is shown. D) Step 4: Signal  
164 reconstruction using spectral estimates derived from each band identification  
165 method. Colored traces show the reconstructed signal using each band identification  
166 method. The black trace from panel A is superimposed for comparison. R<sup>2</sup> values  
167 indicate the explained variance of the reconstructed data segment to the input data  
168 segment. E) Step 5: Reconstruction quantification. Scatter plot shows the raw vs.  
169 reconstructed signal for the entire recording for each reconstruction method. Inset  
170 bar graph shows the proportion of time each band identification method had the  
171 largest r<sup>2</sup>. F) Step 6: Filtered signals and spectral estimates from the method with  
172 the highest reconstruction accuracy are used to compute normalized amplitude in  
173 each band. The plot shows the normalized amplitude in each band defined using the  
174 CoD method.

175  
176 We ran ORCA on each electrode, first asking which band detection method yields the  
177 highest reconstruction accuracy. Figure 3A shows the best method for each subject  
178 and electrode and reveals that custom frequency bands outperform classical  
179 frequency bands in 93% of electrodes. More specifically, we found that bands  
180 defined using the CoD method were best across 57.8% of electrodes, followed by  
181 PeakPick in 30.7% of electrodes. The spectral coefficient of variation (SCV) method  
182 was best in 4.4% of electrodes and the classical bands were best in 6.8% of  
183 electrodes. The CoD and PeakPick methods were best over frontal and posterior  
184 channels, respectively (Figure 3, Supplement 1). Assessing electrodes for which each  
185 method was best, the CoD, PeakPick, and SCV methods identified an average of 4.1,  
186 4.03, and 4.3 frequency as compared to the classical 6 frequency bands. This  
187 observation rules out the possibility that the data-driven methods were superior  
188 because they used more parameters (i.e. frequency bands) to reconstruct the signal.  
189 Together, these findings indicate that data-driven methods to identify frequency  
190 bands can improve spectral decomposition and argue against the usage of *a priori*  
191 frequency bands when performing spectral decomposition.

192  
193

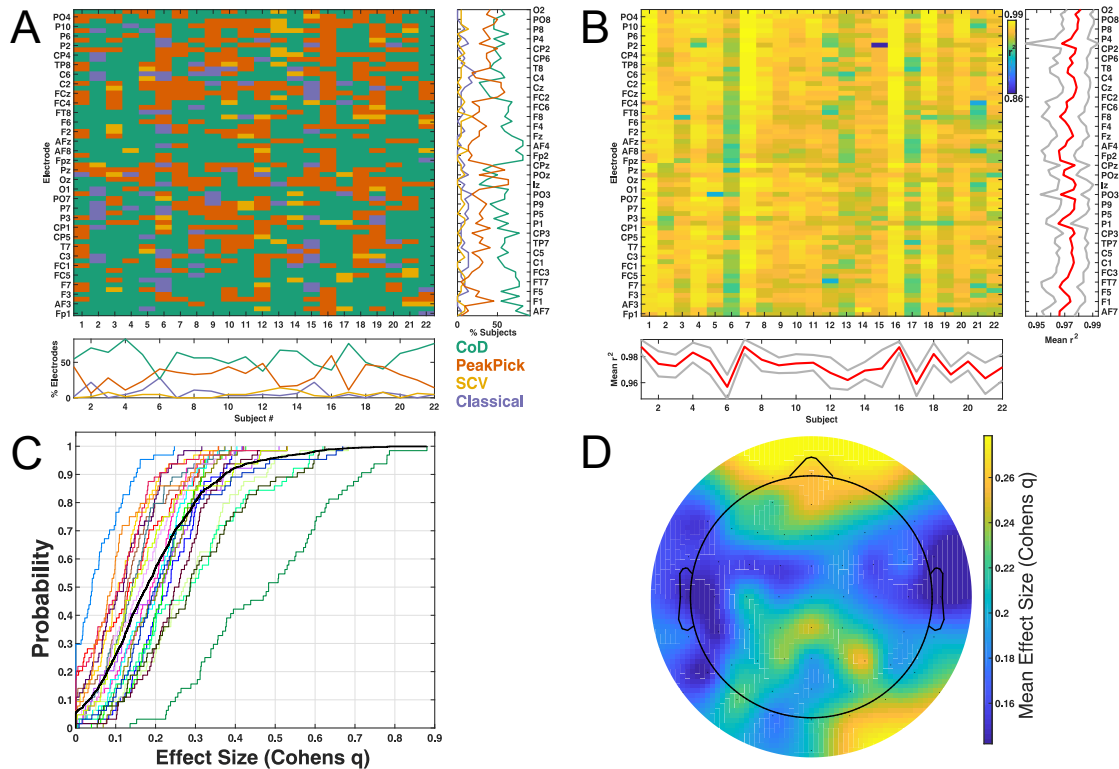

194  
195 **Figure 3: ORCA improves spectral decomposition.**

196 A) The winning band-identification method that yields the highest reconstruction  
197 accuracy for every subject and electrode. The COD method produces the best results  
198 overall, both quantified across subjects at each electrode (right panel) or across  
199 electrodes within subject (lower panel). B) Reconstruction accuracy for the winning  
200 method for every subject and electrode. The right and lower panels show the mean  
201 (red)  $\pm$  1 standard deviation (gray) for each electrode and subject. C) Comparison of  
202 the best method versus classical frequency bands, expressed as an effect size.  
203 Curves show cumulative probability density functions of effect size for each subject.  
204 The black line indicates data pooled over all subjects and electrodes. D) Scalp plot  
205 showing the average effect size (Cohen's  $q$ ) across subjects at each scalp location.  
206

207 We next investigated the improved performance of ORCA, which was able to capture  
208 97.3% of the signal variance on average when using the best method on each  
209 electrode (Figure 3B). We then quantified the improvement in spectral  
210 decomposition between different methods. After Fisher's z-transform, we  
211 compared  $r^2$  values from the best method vs. classical bands (Figure 3B), and  
212 observed significantly greater  $r^2$  values for the best method (paired t-test,  $t(1407) =$   
213  $52.7$ ,  $p < 10^{-10}$ ). Similarly comparing the effect size of improvement between the  
214 best and classical band methods on each electrode, the majority of electrodes (74%)  
215 showed a small to medium effect size, with substantial variation across subjects  
216 (Figure 3C). All but subject 6 showed at least one electrode with a medium effect  
217 size ( $q > .3$ ) and 9/22 subjects showed at least one electrode with a large effect  
218 size ( $q > .5$ ). Frontal and occipital channels showed the largest improvement (Figure 3D).

219 These results demonstrate that ORCA is a superior alternative to conventional  
220 methods for spectral decomposition of neural data.

221  
222 Thus far, we have shown that ORCA improves spectral decomposition through the  
223 identification of electrode-specific frequency bands. We next determined if it is  
224 feasible to make group level inference using these customized frequency bands on  
225 each channel by asking how activity was modulated during eyes open and eyes  
226 closed conditions. Figure 4A shows an example electrode whose ~10 Hz activity was  
227 significantly modulated during eye closure (Bonferroni  $p < .05$  following permutation  
228 test). ORCA captured similar activity modulations spanning the classical alpha and  
229 beta bands at most posterior electrodes in this subject (Figure 4B).

230

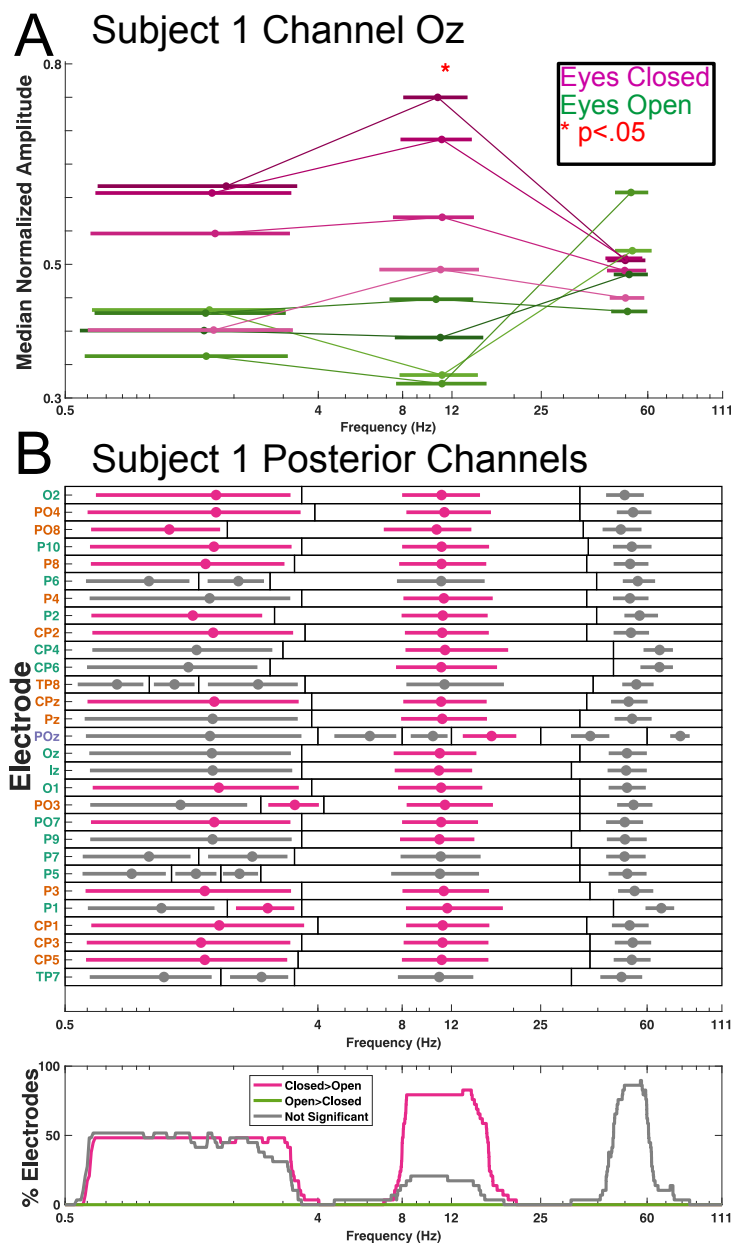

231

232 **Figure 4 ORCA captures subject and electrode-specific activity modulations**  
233 **during eyes-open and eyes closed conditions.**

234 A) Example electrode (Subject 1, electrode 0z) which showed increased amplitude  
235 ~10 Hz oscillations during the eyes-closed condition. Thick lines indicate 95<sup>th</sup>  
236 percentile confidence interval for frequencies detected in each band, and each trial  
237 is connected with a thin line at the median frequency (small dot). B) Bands detected  
238 on each posterior electrode in subjects 1. Horizontal bars indicate 95% confidence  
239 intervals for the frequencies detected in each band and are color-coded according to  
240 significant differences in the normalized amplitude of activity between eyes open-  
241 and eyes-closed task conditions. Black rectangles indicate band edges and dots  
242 within each band indicate median frequency of activity. Electrode labels are color-  
243 coded by the best band-identification method as in Figure 2 & 3. Lower panel shows  
244 the percentage of significant electrodes as a function of frequency.

245  
246 We observed a similar pattern of results when assessing activity across all subjects  
247 at occipital sensors O1 and O2 (Figure 5). Despite heterogeneity in the frequency of  
248 activity in these subjects, roughly 80% of subjects showed significant activity  
249 increases at 10 Hz during eyes closed conditions over central and posterior  
250 electrodes (Figure 5C). These findings indicate that it is possible to understand  
251 behavior-related changes in EEG signals at both the individual and group-level using  
252 ORCA.

253  
254 We next sought to quantify individual differences in the frequency content of neural  
255 activity using the output of ORCA. We calculated the inter-subject correlation  
256 between the frequency of detected activity in each subject (Figure 5 A-B right  
257 panels; Figure 5 Supplement 1). This analysis revealed that the most prototypical  
258 subject (Subjects 18 and 10 in Figure 5A and B, respectively) showed activity with  
259 median frequency centered slightly above 12 Hz that would likely go undetected  
260 using a fixed definition of “alpha activity”. These results further highlight the utility  
261 of ORCA in revealing individual differences in neural signals.

262



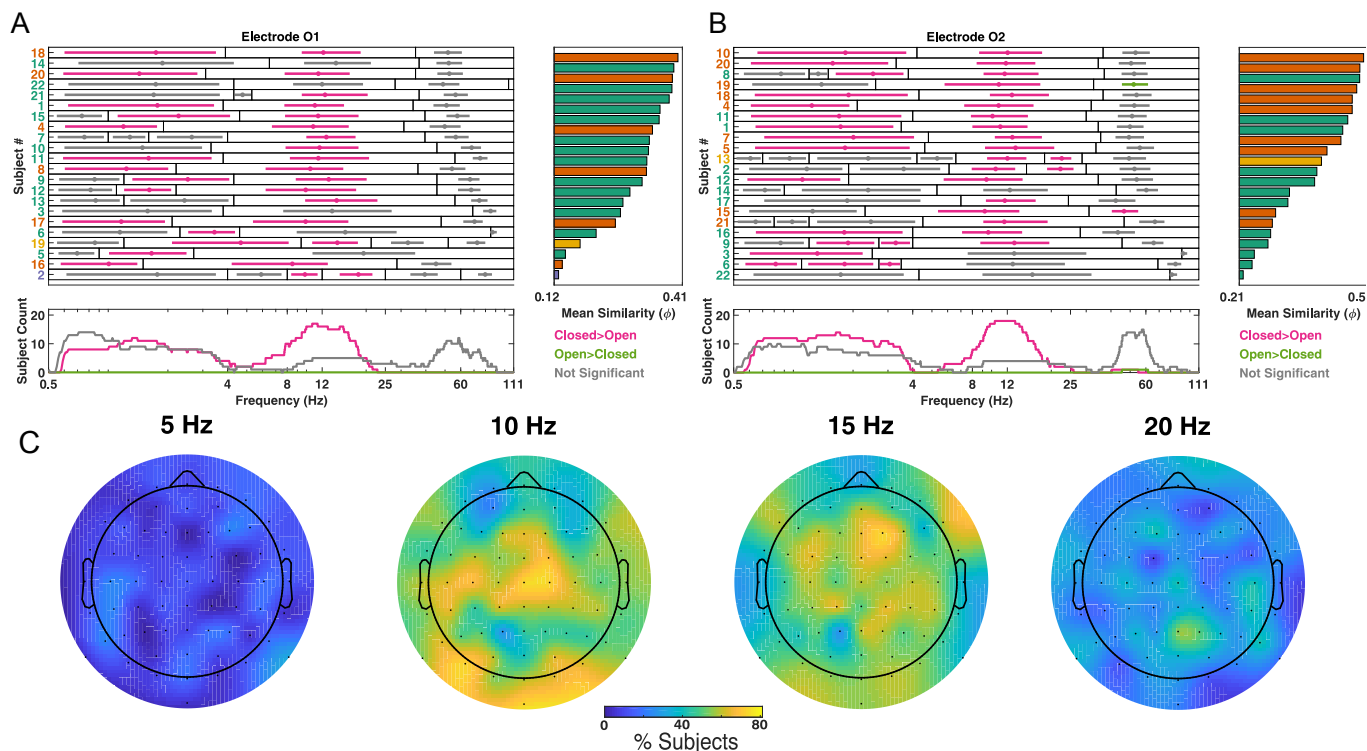

263

264

### Figure 5 Group level analysis of resting EEG modulations using ORCA

265

A) Activity modulations in each subject on channel O1. Left panel) Horizontal bars indicate 95% confidence intervals for the frequencies detected in each band and are color-coded according to significant differences in the normalized amplitude of activity between eyes open- and eyes-closed task conditions. Black rectangles indicate band edges and dots within each band indicate median frequency of activity. Electrode labels are color-coded by the best band-identification method as in Figure 2 & 3 and subjects are sorted according to average similarity of their activity to other subjects (right panel; see also Figure 5 Supplement 1). Lower panel shows the percentage of significant subjects as a function of frequency. B) Similar to A, but depicting bands for all subjects recorded at electrode O2. C) Scalp headmaps showing the percentage of subjects showing significant modulation of activity at each frequency. Most subjects showed modulation at 10 Hz over posterior electrode sites.

277

278

279

We asked how well ORCA performs using other types of neural recordings and analyzed data from rodent hippocampal area CA1 (PFC-2 dataset, crcns.org, Fujisawa et al., 2008). We observed similar performance as in our human dataset (Figure 6), finding that signals on most channels were best reconstructed using the CoD method rather than canonical frequency bands (Figure 2, Supplement 1). ORCA adaptively identified activity in the canonical “theta”, “slow gamma”, and “fast gamma” ranges (Colgin 2016) on most channels (Figure 6B). These results suggest that ORCA can be used on many types of neural signals that are recorded at different spatial scales.

287

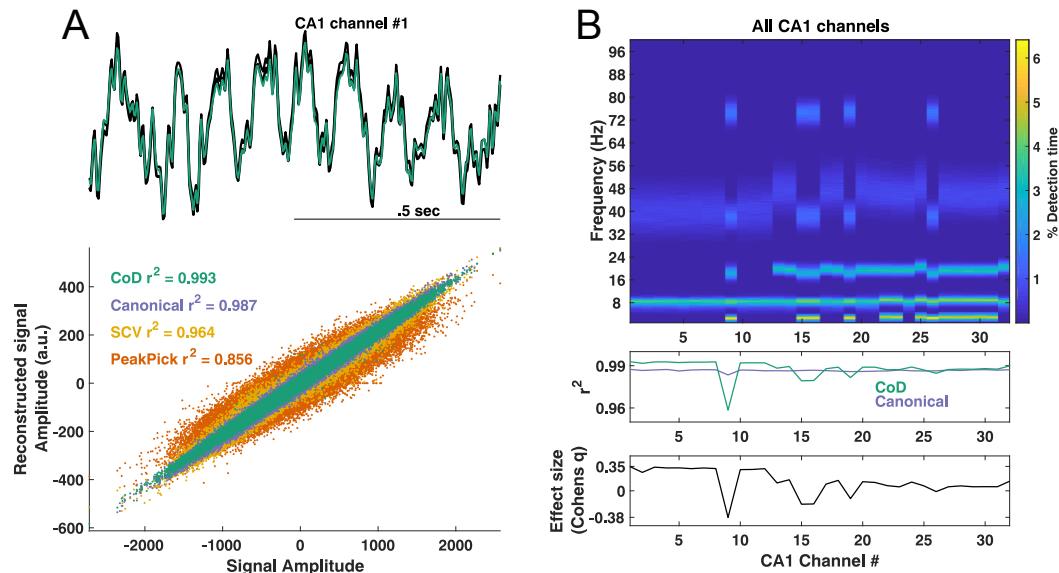

288  
289 **Figure 6: Analysis of rodent CA1 recordings using ORCA.** A) Upper: Example raw  
290 signal from channel 1 (black) along with the reconstructed signal using CoD bands  
291 (green). Lower: Scatter plot showing the raw signal against the reconstructed signal  
292 using each band identification method. B) Upper: Detection time as a function of  
293 channel number (x-axis) and frequency (y-axis). Middle:  $r^2$  values for each channel  
294 for the CoD and canonical band methods. Lower) Effect size of the reconstruction  
295 improvement for the CoD method relative to using canonical bands.

296 Finally, we performed several control analyses. We quantified the view that band  
297 boundaries should be placed far from the signal of interest (de Cheveigne' and  
298 Nelken, 2019), finding that  $r^2$  values are diminished when a band boundary is  
299 located at the same frequency which explain the most signal variance (Figure 6,  
300 Supplement 2). We performed a split-halves analysis in the scalp EEG data and  
301 found a strong positive correlation ( $r=.72$ ) between  $r^2$  values derived separately on  
302 the first half and second half of each recording, indicating that oscillatory bands are  
303 mostly stable. Lastly, we shifted amplitude and phase estimates in time prior to  
304 signal reconstruction in order to test the temporal precision of ORCA and the  
305 validity of its output, finding that signal reconstruction is greatly reduced under  
306 these circumstances (Figure 6, Supplement 3). Taken together, our results  
307 demonstrate that ORCA provides improved spectral estimates in both time and  
308 frequency in both human and rodent data, providing a proof-of-principle for future  
309 work assessing how electrode and band-specific oscillatory activity co-varies with  
310 behavior in spectrally-diverse neural signals recorded in different scales and  
311 species.

312

### 313 Discussion

314 Analyzing resting EEG and rodent hippocampal recordings, we demonstrate  
315 substantial spectral variability across electrodes and subjects in a comparatively  
316 simple behavioral setting, highlighting the need for refined approaches when  
317 analyzing oscillations. To this end, we developed several novel methods for

318 identifying frequency bands based on different statistical properties of each  
319 recording. These methods are incorporated into ORCA, a novel algorithm that pits  
320 different models of oscillatory activity against one another to best capture spectral  
321 variability and provide improved spectral decomposition. Notably, 93% of channels  
322 showed improved spectral decomposition using these new methods rather than  
323 canonical frequency bands (Figure 3). ORCA readily identified amplitude  
324 modulations in electrode-specific frequency bands associated with eye closure,  
325 consistent with decades of research (Berger et al., 1929; Geller et al., 2014; Trujillo  
326 et al., 2017). We then applied ORCA to rodent hippocampal recordings and observed  
327 that it was capable of blindly identifying theta and gamma components of the neural  
328 signal (Colgin, 2016). Our results thus provide a proof-of-principle for using ORCA  
329 to analyze electrophysiological recordings with more precision and with less bias  
330 than has been previously been possible.

331  
332 Across all 1408 EEG channels, 93% of channels showed optimized spectral  
333 decomposition using customized frequency bands rather than canonical frequency  
334 bands. What accounts for such an improvement? We believe this likely occurs  
335 because many channels in our EEG dataset have activity spanning the canonical  
336 frequency band boundaries (Figure 5, Figure 5 Supplement 1). Given that it is  
337 important to select band edges away from the signal of interest in order to avoid  
338 filtering artifacts (de Cheveigne' and Nelken, 2019), it follows that placing a band  
339 boundary at 12 Hz using canonical bands would lead to poor filtering and spectral  
340 estimation (see also Figure 5, Supplement 1). We conclude that spectral  
341 decomposition improvements rendered by ORCA are dependent on the spectral  
342 content of the underlying data and thus other datasets may not see such a dramatic  
343 improvement in spectral decomposition. Nonetheless, our results clearly argue  
344 against the use of canonical, "one-size-fits-all" frequency bands when performing  
345 spectral decomposition, and provide a benchmark for quantifying different  
346 oscillatory models and spectral decomposition performance through signal  
347 reconstruction.

348  
349 We use the term "optimized" to refer to relative increases in reconstruction between  
350 different frequency band models. Going forward, band detection is modular such  
351 that improved methods for detecting bands may be incorporated, as was the case  
352 with the "CoD" and "SCV" band identification methods. Future work might use  
353 genetic algorithms to further refine band identification and/or more explicitly  
354 model aperiodic components of the signal (Haller, Donoghue, Peterson et al.,  
355 *BiorXiv*). We observed that frequency bands were mostly stable over time, though  
356 this warrants further investigation, particularly in datasets that contain diverse  
357 behavioral states. Future work may extend ORCA by defining bands on smaller  
358 subsets of data which could be useful for data cleaning such that data segments with  
359 poor decomposition, perhaps based on non-physiological artifacts, can be excluded  
360 based on statistically principled grounds.

361  
362 ORCA draws inspiration from and builds upon prior work which aims to identify  
363 and quantify oscillatory components of neural signals, such as "Pepisode"/ "BOSC",

364 “foof”, “bicycle”, and “MODAL” (Hughes et al., 2012; Haller, Donoghue, Peterson, et  
365 al 2018; Watrous et al., 2018; Cole & Voytek, 2019). Our approach blindly identifies  
366 oscillatory bands with very minimal parameterization, quantifies different models  
367 of oscillatory activity to improve spectral decomposition accuracy, and provides  
368 time-resolved spectral estimates in each band. These features provide new avenues  
369 to standardize analysis procedures across research groups. Comparing activity over  
370 subjects, ORCA also allows for the identification of comparatively typical and  
371 atypical frequency content of neural recordings that may be useful clinically by  
372 providing normative data. Finally, ORCA outputs a relatively low-dimensional,  
373 “compact” representation of neural signals by providing time-resolved amplitude,  
374 phase, and frequency in each band that can facilitate interrogating the relation  
375 between neural spiking, oscillatory activity, and behavior.

376  
377

## 378 **Methods**

379 We first provide a description of the ORCA algorithm before describing its key steps  
380 and how it was applied to the example datasets.

381

### 382 *The Oscillatory ReConstruction Algorithm (ORCA):*

#### 383 *Overview*

384 ORCA was developed in Matlab and additionally requires the wavelet toolbox for  
385 signal reconstruction. Matlab code for the algorithm is provided on Github  
386 ([www.github.com/andrew-j-watrous/ORCA](http://www.github.com/andrew-j-watrous/ORCA)). Figure 2 shows a schematic of the key  
387 steps in the ORCA algorithm and we describe optional preprocessing and validation  
388 steps further below. ORCA requires an input signal that can be any time-series data,  
389 the sampling rate, and a wide-band frequency range to be analyzed (e.g. .5-150 Hz).  
390 ORCA segments this broad frequency range into bands using 4 different methods  
391 (see below) and the signal is band-pass filtered in each band between the band  
392 boundaries (e.g. 3 to 12 Hz). ORCA then calculates spectral estimates (amplitude,  
393 phase, and frequency of the filtered signal) in each band. Spectral estimates pooled  
394 across bands are then used to reconstruct a signal. To measure spectral  
395 decomposition performance, the reconstructed signal is compared to the input  
396 signal by calculating the linear fit between signals (“regstats” in Matlab), resulting in  
397 an  $r^2$  value for each band identification method. The band-identification method  
398 with the largest  $r^2$  is considered the “best” method and the spectral estimates and  
399 bands from this method are retained, while those from the other methods are  
400 discarded.

401

#### 402 *Band identification*

403 ORCA uses up to four methods to determine frequency bands. The first and  
404 simplest method allows the user to define frequency bands. In this manuscript, we  
405 used this method to investigate spectral decomposition using the classical frequency  
406 bands (Figure 2B; purple bar), defined as .5-4 Hz “delta”, 4-8 Hz “theta”, 8-12 Hz  
407 “alpha”, 12-25 Hz “beta”, 25-60 Hz “slow gamma” and 60-111 Hz “fast gamma”.  
408 Throughout this manuscript, we interchangeably refer to this method as “Classical”  
409 and “Canonical”.

410 Each other method defines band boundaries based on different statistical  
411 characteristics of the neural signal. By default, these statistics are computed on the  
412 first half of the input signal as a means to cross-validate and avoid over-fitting. The  
413 second method, “SCV” (Figure 2B; yellow), uses local minima in the spectral  
414 coefficient of variation (SCV), a power-normalized estimate of variability at each  
415 frequency. Oscillatory power is calculated using 6-cycle Morlet wavelets at 200 log-  
416 spaced frequencies from .5 Hz to the Nyquist frequency. SCV is calculated as the  
417 standard deviation of power values divided by the mean over time at each  
418 frequency. Band edges are defined as local minima in the SCV function. The rationale  
419 for this method is that frequencies with comparatively high variability may contain  
420 transient oscillations while frequencies with comparatively low variability can then  
421 be taken as band edges. We note, however, that semi-continuous oscillatory signals  
422 such as rodent hippocampal theta may violate this assumption.

423 The “CoD” method (Figure 2B, green bars) calculates the coefficient of  
424 determination ( $r^2$ ) at each frequency by quantifying the fit between the input signal  
425 and a reconstructed signal based on activity at each point frequency. Specifically,  
426 following spectral decomposition using a continuous wavelet transform, this  
427 method uses the inverse continuous wavelet transform separately at each frequency  
428 to reconstruct the input signal and quantifies the fit between the input and  
429 reconstructed as above. Band edges are defined as 1) local minima in the CoD  
430 function and 2) frequencies in which the explained variance is less than what is  
431 expected by chance. The rationale here is to use the CoD function to identify band  
432 boundaries as frequencies with comparatively low explained variance to the input  
433 signal.

434 Finally, for comparison to previous approaches (Watrous et al., 2018; Lega et al.,  
435 2012; Podvalny et al., 2015), we included a fourth method (“PeakPick”; orange bars  
436 in Figure 2B). Using the same power values as in the SCV method, we created a  
437 power spectrum by averaging wavelet power values over time and fit a line to this  
438 spectrum in log-log space using *robustfit* in Matlab. Frequency band edges were  
439 defined as those frequencies in the power spectrum that transitioned above or  
440 below this fit. Frequency bands for all methods were constrained to be wider than .5  
441 Hz in order to ensure accurate filtering.

442

#### 443 Filtering

444 Filtering was performed as in the original “frequency sliding” algorithm (Cohen  
445 2014), with one modification that ensured accurate filtering across a variety of  
446 frequency bands with different bandwidths (e.g. .5-1 Hz, .5- 50 Hz). We thus  
447 optimized the transition bandwidth for each frequency band by filtering using  
448 different transition widths (.01-.13, .03 steps) and retained the filtered signal with  
449 the largest correlation to the raw signal. This modification was necessary for  
450 accurate filtering both very narrow and very wide frequency bands. Similar to  
451 previous work, instantaneous frequency estimates arising from phase-slips (Cohen,  
452 2014) that were outside of each frequency band were replaced by NaN (Watrous et  
453 al., 2018; eLife).

454

455 Signal Reconstruction and quantification of spectral decomposition performance

456 Reconstructed signals were generated using a synthetic continuous wavelet  
457 transform matrix using the instantaneous amplitude, phase, and frequency of  
458 activity in each band and then applying the inverse continuous waveform transform  
459 (icwt.m in Matlab). This synthetic matrix is sparse, with only as many non-zero  
460 values as detected frequency bands at each time sample, and thus the reconstructed  
461 signal amplitude is arbitrarily smaller than the observed signal. Spectral  
462 decomposition accuracy was determined by calculating the explained variance ( $r^2$ )  
463 between the input and reconstructed signal. We then conducted follow-up analyses  
464 investigating the proportion of time each method performed best (e.g. Figure 2E) by  
465 calculating  $r^2$  values in 1 second, non-overlapping windows and identifying the  
466 method with the largest  $r^2$  in each window.

467

#### 468 Normalized amplitude calculation

469 We calculated a measure of normalized amplitude (Figure 2F) using a cycle-  
470 by-cycle approach (Cole & Voytek, 2017). The filtered signal in each band is parsed  
471 into half-waves by identifying peaks and troughs in the filtered signal and the  
472 amplitude of each half-wave is then calculated as the absolute value of the peak to  
473 trough height. To account for the approximately inverse relation between  
474 oscillatory frequency and amplitude, we normalized each half-wave amplitude by  
475 multiplying it by its instantaneous frequency. Each half-wave is then ranked against  
476 all others across the full recording such that all values are within a range of 0 to 1  
477 (smallest to largest, respectively).

478

#### 479 EEG Dataset and analyses

480 For results related to human recordings, we analyzed a published scalp EEG  
481 dataset (EEG; Trujillo et al., 2017) of 22 subjects recorded during eyes open- and  
482 eyes-closed conditions. This dataset consists of 64 scalp channels sampled at 256 Hz  
483 and referenced to a common mode sense electrode located between sites Po3 and  
484 POz. Subject performed a total of 8 minutes of interleaved, 60 second blocks of  
485 either eyes-open or eyes-closed conditions (4 “trials” each). For this EEG dataset, we  
486 mean-centered each recording and performed line noise reduction using a bandstop  
487 filter from 58-62 Hz prior to decomposition with ORCA and did not perform artifact  
488 correction.

489 Each pre-processed channel was analyzed with ORCA as a continuous,  
490 unepoched recording. Following spectral decomposition with ORCA, the median  
491 normalized amplitude value was extracted from each 60-second trial in each  
492 detected frequency band (Figure 4A). These median values for eyes-open and eyes-  
493 closed conditions were compared using nonparametric Mann-Whitney tests. We  
494 shuffled the condition labels associated with each value a total of 70 times  
495 (corresponding to the number of unique groupings of 8 values) and recomputed a  
496 pseudo test statistic. The true test statistic was ranked against the distribution of 70  
497 pseudo test statistic values to derive a shuffle-corrected p-value. We then performed  
498 Bonferroni correction for multiple comparisons (frequency bands) on each  
499 electrode. P-values exceeding the 95<sup>th</sup> percentile or below the 5<sup>th</sup> percentile after  
500 Bonferroni-correction were considered significant.

501 To identify subjects with similar activity (Figure 5), we first generated a  
502 Boolean matrix for each channel indicating whether activity was detected at each  
503 frequency when using different percentile inclusion criteria (Figure 5, Supplement  
504 1). This allowed us to circumvent the issue that each channel may have different  
505 numbers of frequency bands and that the same frequency (e.g. 10 Hz) may be  
506 included in a different band in different subjects. We calculated the Phi correlation  
507 between these Boolean matrices in order to determine similarity of detected activity  
508 between subjects. We then calculated the mean Phi coefficient for each subject to  
509 determine each subject's average similarity on each channel.

510

#### 511 Rodent Dataset and analyses

512 For results related to rodent recordings, we analyzed a subset of recordings  
513 from a publicly-available dataset (Fujisawa et al., 2008; crcns.org PFC-2 dataset).  
514 Specifically, we analyzed the first 5 minutes of CA1 recordings from session  
515 "ee708/EE.188" during which the rat was performing a spatial working memory  
516 task. Prior to decomposition with ORCA, signals were downsampled to 312.5 Hz.  
517 Signals were broadband filtered from 1-100 Hz and canonical bands were defined as  
518 1-4, 4-12, 12-25, 25-55, and 55-100 Hz (Colgin, 2016). We again implemented a  
519 cross-validated band-identification procedure such that the first 2.5 minutes of the  
520 signal were used to generate bands for the CoD, SCV, and PeakPick band  
521 identification methods. We did not do artifact rejection.

522 We tested the assumption that band boundaries should be placed far from  
523 the signal of interest (de Cheveigne' and Nelken, 2019) using the first CA1 channel in  
524 the rodent recordings. This signal was chosen because it was best reconstructed  
525 using two bands and a single frequency boundary at 17.1 Hz (Figure 6, Supplement  
526 1). To this end, we generated a separate model with a single band boundary at each  
527 frequency and recalculated signal reconstruction accuracy.

528

529

530

531

532

533

534

535

536

537

538

539

540

541

542

543

544

545

546

## 547 Supplemental Figures

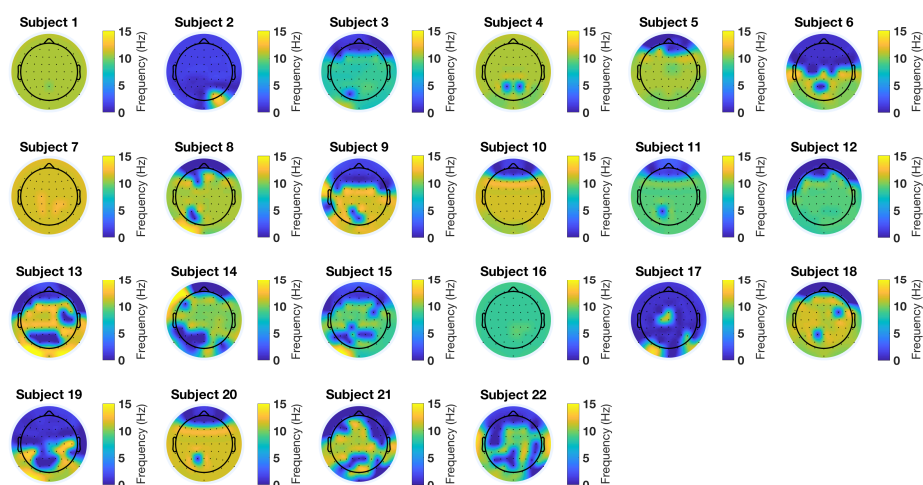

548

549

### Figure 1 Supplement 1

550

The frequency that explains the most variance to recordings on each electrode is

551

plotted as a scalp topography for each subject. Note that most subjects have

552

different frequencies at different sites and also that some subjects have stable

553

frequencies across locations but differ between themselves (e.g. Subject 1 and 16).

554

These observations motivate the use of spectral decomposition methods that

555

account for frequency variability across individuals and electrodes.

556

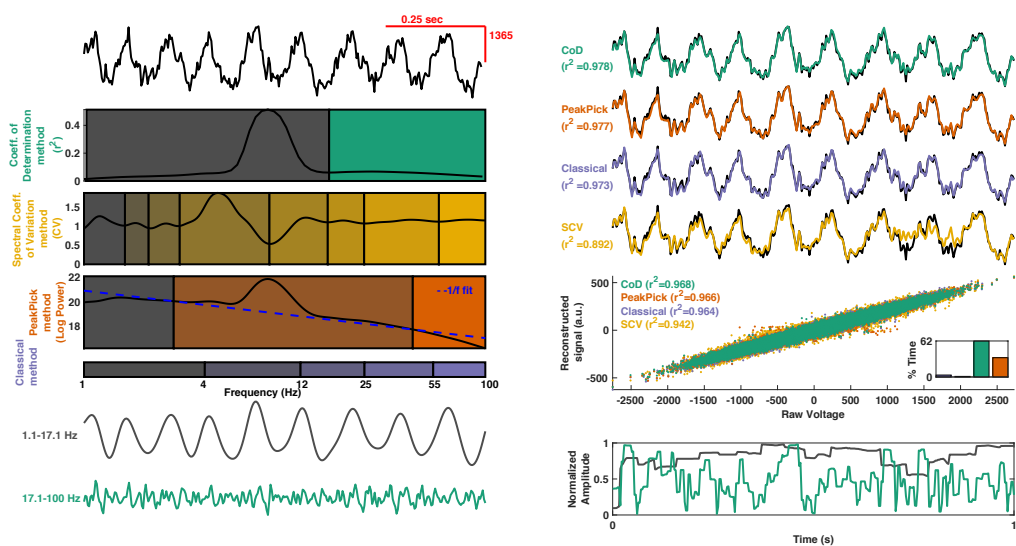

557

558

### Figure 2, Supplement 1

559

ORCA schematic using channel 1 from the rodent dataset. See Figure 2 caption for

560

further details on figure layout.



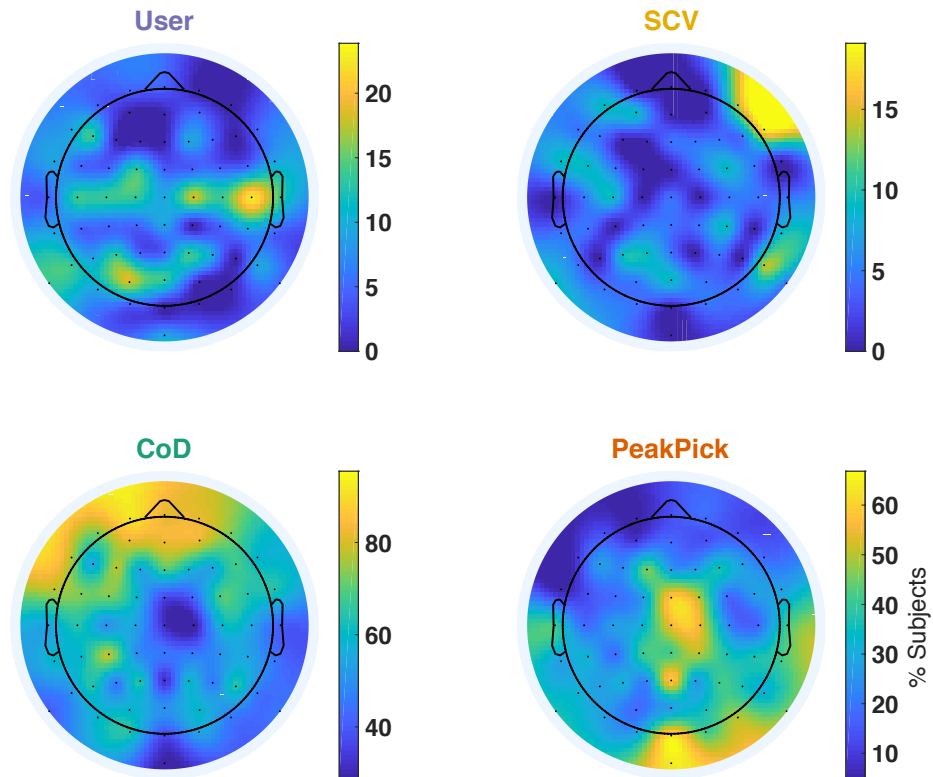

561  
562

**Figure 3, Supplement 1**

563 Scalp topographic maps showing the percentage of subjects for which each method  
564 yielded the largest reconstruction accuracy.

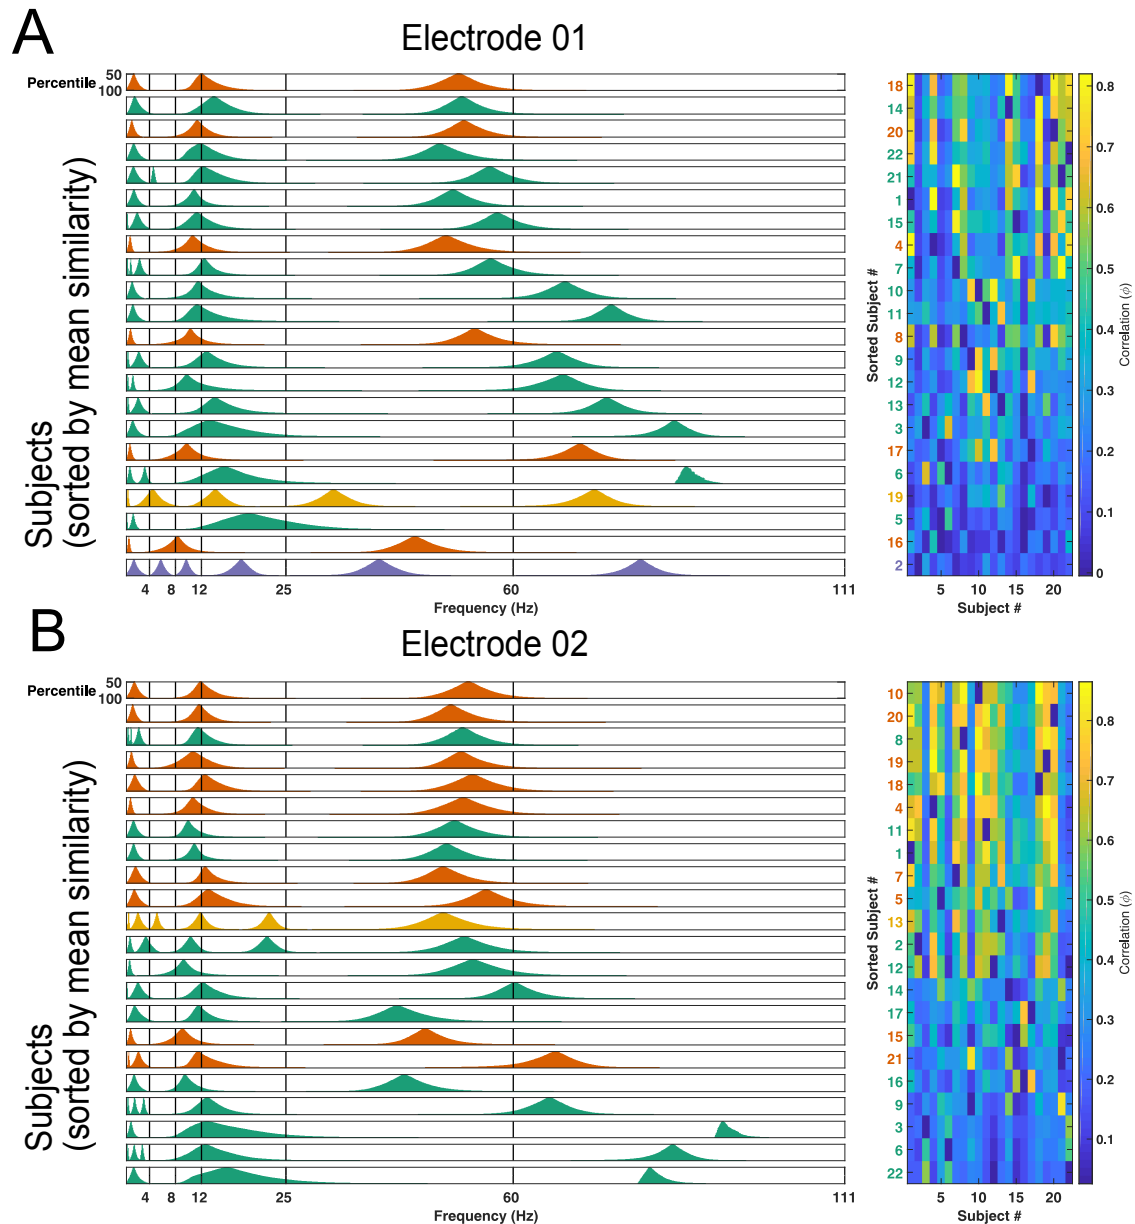

565  
566  
567  
568  
569  
570  
571  
572  
573  
574  
575  
576

**Figure 5, Supplement 1**

A) Frequency bands for each subject defined over different confidence levels (y-axis in each subpanel) for electrode 01. Data for each subject is color-coded according to the band-identification method used, as in Figures 2 and 3. Note that many subjects have activity spanning the canonical frequency bands (black vertical lines). Right panel shows the inter-subject correlation coefficients for each sorted subject. In both panels, subjects are sorted according to their mean similarity with activity detected in other subjects, from least to most similar (bottom to top, respectively). B) Same layout as A but for electrode 02.

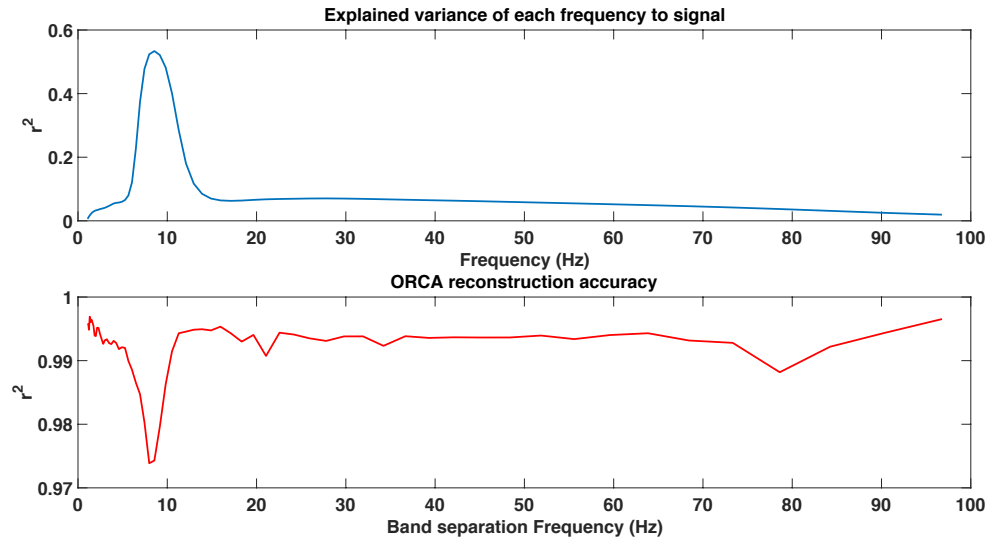

577  
578

579 **Figure 6, Supplement 1**

580 Upper panel: Explained variance of each frequency to the recorded signal for rodent  
581 CA1 channel 1. This channel was best reconstructed using a single band boundary at  
582 17.1 Hz (Figure 2, Supplement 1). Lower panel: Reconstruction accuracy as a  
583 function of the location of this single band boundary. Reconstruction is worst when  
584 the band boundary is placed at  $\sim 8$  Hz, validating the idea that (filter) band  
585 boundaries should be placed away from the signal of interest when performing  
586 filtering and spectral decomposition (de Cheveigne' and Nelken, 2019).  
587

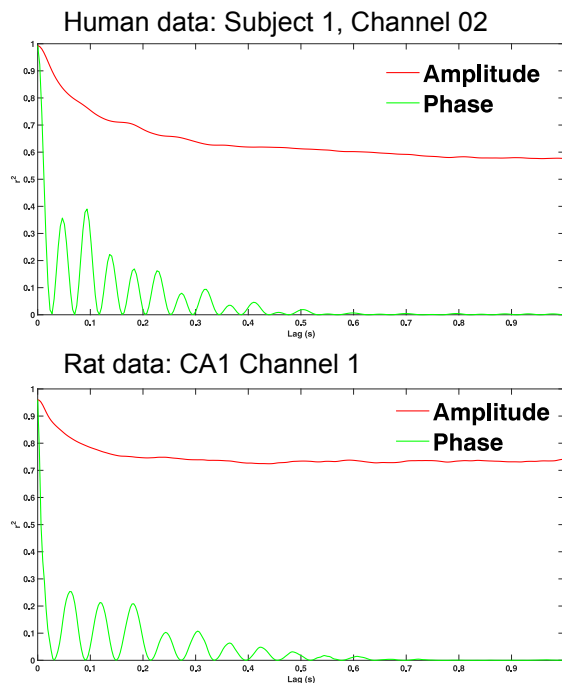

588  
589  
590

**Figure 6, Supplement 2.** Shifting spectral estimates in time abolishes reconstruction accuracy. Upper) Human data showing that increasing the lag (x-

591 axis) between either the amplitude or phase estimates and the input signal reduces  
592 reconstruction accuracy (y-axis). A lag of zero indicates no temporal shuffling for  
593 which reconstruction accuracy is  $> .95$ . Lower) Same as above but for the first  
594 channel of rodent CA1 data.

595  
596  
597  
598  
599  
600  
601  
602  
603  
604  
605  
606  
607  
608  
609  
610  
611  
612  
613  
614  
615  
616  
617  
618  
619  
620  
621  
622  
623  
624  
625  
626  
627  
628  
629  
630  
631  
632  
633  
634  
635

636 **Acknowledgments**

637 We thank Arne Ekstrom for helpful feedback on this manuscript.

638

639 **References**

640 Addante, RJ, AJ Watrous, AP Yonelinas, AD Ekstrom, Ranganath C. (2011).

641 "Prestimulus theta activity predicts correct source memory retrieval". PNAS

642 108(27):10702-10707

643

644 Berger, H. 1929. Übert das Elektrenkephalogramm des Menschen (On the human  
645 electroencephalogram). *Archiv f. Psychiatrie u. Nervenkrankheiten*87:527-70.

646

647 Brazier MAB, Cobb WA, Fischgold H, Gastault H, Gloor P, Hess R, et al. Preliminary  
648 proposal for an EEG terminology by the terminology committee for the International  
649 Federation for Electroencephalography and Clinical  
650 Neurophysiology. *Electroencephalography and Clinical*

651 *Neurophysiology*. 1961;13:646–650

652

653 Buzsaki, G., C. A. Anastassiou and C. Koch (2012). "The origin of extracellular fields  
654 and currents--EEG, ECoG, LFP and spikes." Nat Rev Neurosci 13(6): 407-420.

655

656 Cecere R, Rees G, Romei V. (2015) "Individual differences in alpha frequency drive  
657 crossmodal illusory perception." Current Biology. 25(2):231-235. doi:  
658 10.1016/j.cub.2014.11.034.

659

660 Cohen, M. X. (2014). "Fluctuations in oscillation frequency control spike timing and  
661 coordinate neural networks." J Neurosci 34(27): 8988-8998.

662

663 Cole, S.R. & Voytek B (2017). "Brain oscillations and the importance of waveform  
664 shape." Trends Cognitive Science 21(2):137-149

665

666 Cole, S & Voytek B (2019). "Cycle-by-cycle analysis of neural oscillations." J  
667 Neurophysiology 122(2) 849-861.

668

669 Colgin LL. (2016). "Rhythms of the hippocampal network". Nat Rev Neurosci  
670 17(4):239-249

671

672 de Cheveigné A, Nelken I. (2019) "Filters: When, Why, and How (Not) to Use Them."  
673 Neuron.102(2):280-293. doi: 10.1016/j.neuron.2019.02.039

674

675 Fujisawa S, Amarasingham A, Harrison MT, Buzsáki G (2008). "Behavior-dependent  
676 short-term assembly dynamics in the medial prefrontal cortex" Nat Neurosci  
677 11(7):823-33.

678

679 Furman AJ, Meeker TJ, Rietschel JC, Yoo S, Multhulingam J, Prokhorenko M, Keaser  
680 ML, Goodman RN, Mazaheri A, Seminowicz DA (2018). "Cerebral peak alpha

681 frequency predicts individual differences in pain sensitivity". Neuroimage  
682 167:2003:2010  
683  
684 Gelinas, J. N., D. Khodagholy, T. Thesen, O. Devinsky and G. Buzsaki (2016).  
685 "Interictal epileptiform discharges induce hippocampal-cortical coupling in  
686 temporal lobe epilepsy." J Neurosci 22(6): 641-648.  
687  
688 Geller A.S., J.F. Burke, M.R. Sperling, A.D. Sharan, B. Litt, G.H. Baltuch, T.H. Lucas 2<sup>nd</sup>,  
689 & M.J. Kahana (2014) "Eye closure causes widespread low-frequency power  
690 increase and focal gamma attenuation in the human electrocorticogram." Clin  
691 Neurophysiology 125(9):1764-1773  
692  
693 Haegens S, Cousijn H, Wallis G, Harrison PJ, Nobre AC. (2014) "Inter- and intra-  
694 individual variability in alpha peak frequency." Neuroimage.92:46-55. doi:  
695 10.1016/j.neuroimage.2014.01.049.  
696  
697 Haller M, Thomas Donoghue, Erik Peterson, Paroma Varma, Priyadarshini Sebastian,  
698 Richard Gao, Torben Noto, Robert T. Knight, Avgusta Shestyuk, Bradley Voytek  
699 "Parameterizing neural power spectra" bioRxiv 299859; doi:  
700 <https://doi.org/10.1101/299859>  
701  
702 Hanslmayr S, Staudigl T, Fellner M-C. (2012) "Oscillatory power decreases and long-  
703 term memory: the information via desynchronization hypothesis" Front. Hum  
704 Neurosci. <https://doi.org/10.3389/fnhum.2012.00074>  
705  
706 Hughes A.M, Whitten TA, Caplan JB, Dickson CT (2011) "BOSC: A better oscillation  
707 detection method, extracts both sustained and transient rhythms from rat  
708 hippocampal recordings". Hippocampus 22(6) 1417-1428  
709  
710 Klimesch W (1999) EEG alpha and theta oscillations reflect cognitive and memory  
711 performance: a review and analysis. Brain Res Brain Res Rev. 169-95.  
712  
713 Lega, B. C., J. Jacobs and M. Kahana (2012). "Human hippocampal theta oscillations  
714 and the formation of episodic memories." Hippocampus 22(4): 748-761.  
715  
716 Mireau, Klimesch, Lefebvre (2017). "State-dependent alpha peak frequency shifts:  
717 experimental evidence, potential mechanisms, and functional implications."  
718 Neuroscience  
719  
720 Newsom J.J., Thiagarajan T.C. (2019). "EEG frequency bands in psychiatric disorders:  
721 A review of resting state studies." Frontiers in Human Neuroscience 12:521  
722  
723 Podvalny, E., N. Noy, M. Harel, S. Bickel, G. Chechik, C. E. Schroeder, A. D. Mehta, M.  
724 Tsodyks and R. Malach (2015). "A unifying principle underlying the extracellular  
725 field potential spectral responses in the human cortex." J Neurophysiol 114(1): 505-  
726 519.

727

728 Rudrauf D, Douiri A, Kovach C, Lachaux JP, Cosmelli D, Chavez M, Adam C, Renault B,  
729 Martinerie J, Le Van Quyen M. (2006) "Frequency flows and the time-frequency  
730 dynamics of multivariate phase synchronization in brain signals". Neuroimage; 31  
731 (1) 209-227

732

733 Trujillo LT, Stanfield CT, Vela RD. (2017) "The Effect of Electroencephalogram (EEG)  
734 Reference Choice on Information-Theoretic Measures of the Complexity and  
735 Integration of EEG Signals." Front Neurosci.;11:425. doi: 10.3389/fnins.2017.00425.

736

737 Watrous, A. J. (2018) "MODAL", Github, [https://github.com/andrew-j-](https://github.com/andrew-j-watrous/MODAL)  
738 [watrous/MODAL](https://github.com/andrew-j-watrous/MODAL), 0

739

740 Watrous AJ, Miller J, Qasim SE, Fried I, Jacobs J. (2018) "Phase-tuned neuronal firing  
741 encodes human contextual representations for navigational goals." Elife. 2018 Jun  
742 22;7. pii: e32554. doi: 10.7554/eLife.32554.

743

744 Watrous, A. J., J. Fell, A. D. Ekstrom and N. Axmacher (2015a). "More than spikes:  
745 common oscillatory mechanisms for content specific neural representations during  
746 perception and memory." Curr Opin Neurobiol 31: 33-39.

747

748 Watrous AJ, Tandon N, Conner CR, Pieters T, Ekstrom AD. (2013) "Frequency-  
749 specific network connectivity increases underlie accurate spatiotemporal memory  
750 retrieval." Nat Neurosci. 2013 Mar;16(3):349-56. doi: 10.1038/nn.3315.

751

752 Wutz A, Melcher D, Samaha J. (2018) "Frequency modulation of neural oscillations  
753 according to visual task demands." PNAS. 2018 Feb 6;115(6):1346-1351. doi:  
754 10.1073/pnas.1713318115

754

755 Zhang H, Watrous A.J., Patel A, Jacobs J (2018) "Theta and Alpha Oscillations Are  
756 Traveling Waves in the Human Neocortex." Neuron. 98(6):1269-1281.e4. doi:  
757 10.1016/j.neuron.2018.05.019.

758
